# Supplementary material
Source: publisher site journal article supplement (https://www.dovepress.com/article/507337)
Supplement: Supplementary file 1 [file get_supplementary_file.php]

**Supplementary Materials**

| Supplementary Table 1. P-valure of Spearman analysis. | | | | |  | | |  |
| --- | --- | --- | --- | --- | --- | --- | --- | --- |
| **Variable** | **MMP-2** | **MMP-3** | **MMP-9** | **pH** | | **HCO3-** |
| MMP-2 | - | 0.001456312 | 0.000618437 | 6.64E-07 | | 0.000603921 |
| MMP-3 | 0.001456312 | - | 4.96E-44 | 4.43E-27 | | 8.00E-12 |
| MMP-9 | 0.000618437 | 4.96E-44 | - | 2.29E-31 | | 9.29E-13 |
| pH | 6.64E-07 | 4.43E-27 | 2.29E-31 | - | | 2.67E-12 |
| HCO3- | 0.000603921 | 8.00E-12 | 9.29E-13 | 2.67E-12 | | - |
| Notes: - Confidence intervals are provided for the correlation coefficients (rs) between the listed variables. - MMP stands for matrix metalloproteinase; pH and HCO₃⁻ denote acidity/alkalinity and bicarbonate ion concentration, respectively. | | | | | | | | |

| Supplementary Table 2. Confidence Intervals of rs Correlations. | | | | |  | |  | |
| --- | --- | --- | --- | --- | --- | --- | --- | --- |
| **Variable** | **MMP-2** | **MMP-3** | **MMP-9** | **pH** | | **HCO₃⁻** | |
| MMP-2 | - | -0.6164 to -0.1634 | -0.6374 to -0.1968 | 0.4043 to 0.7544 | | 0.1977 to 0.6379 | |
| MMP-3 | -0.6164 to -0.1634 | - | 0.9764 to 0.9922 | -0.9657 to -0.8995 | | -0.8568 to -0.6210 | |
| MMP-9 | -0.6374 to -0.1968 | 0.9764 to 0.9922 | - | -0.9765 to -0.9304 | | -0.8697 to -0.6514 | |
| pH | 0.4043 to 0.7544 | -0.9657 to -0.8995 | -0.9765 to -0.9304 | - | | 0.6368 to 0.8636 | |
| HCO₃⁻ | 0.1977 to 0.6379 | -0.8568 to -0.6210 | -0.8697 to -0.6514 | 0.6368 to 0.8636 | | - | |
| Notes: - Confidence intervals are provided for the correlation coefficients (rs) between the listed variables. - MMP stands for matrix metalloproteinase; pH and HCO₃⁻ denote acidity/alkalinity and bicarbonate ion concentration, respectively. | | | | | | | | |
